# Supplementary material for: How salts affect mud mobility at low pressures: implications for Mars and other extraterrestrial bodies
Source: Research Square preprint supplement (doi:10.21203/rs.3.rs-4795332/v1), 2024-09-18
Supplement: Supplementary file 1 [file 51f30f660c0edd2fd7db9c48.xlsx]

## Sheet: List1
Cooling
Exp #	Type*	Rate	Pressure limit	Salt *	Concentration	Initial temperature	Initial temperature	Boiling time	Freezing time	Pressure	Pressure	Finite temperature	Included in	Internal features
			[mbar]		[% w/w]	averaged [°C ]	difference [°C ] **	(a, b, c, d) [s] ***	[s] ****	boiling [mbar] *5	freezing [mbar] *5	3 cm above the bottom [°C] *6	main analysis	(main observations)
1	salt	fast	2.2	NaCl	0.5 - 10	19.22	0.2	140, 143, 145 149	340, 500, 710, 1310	-	-	4.35, -0.15, -2.75, -4.95	yes	a,b,d thin ice lids, c column freezing
2	salt	fast	1.2	MgSO4	0.5 - 10	19.7	0.4	138, 139, 139, 140	300, 298, 315, 337	-	-	3.95, 2.75, 2.05, 0.05	yes	ice lids, gradually increased thickness
3	salt	fast	2.3	MgSO4	0.5 - 10	19.5	0.3	140, 141, 142, 140	297, 309, 327, 315	-	-	4.35, 3.25, 2.35, 0.15	yes	ice lids, gradually increased thickness
4	salt	fast	2.2	NaCl	0.5 - 10	19.35	0.4	138, 140, 142, 145	326, 390, 480, 650	-	-	2.65, 0.95, -2.05, -5.25	yes	ice lids, gradually increased thickness
5	salt	fast	2.1	NaCl	0.5 - 10	20.2	0.2	136, 138, 141, 144	328, 360, 440, 700	-	-	3.15, -0.55, -2.85, -5.95	yes	ice lids, gradually increased thickness
6	salt	fast	1.7	MgSO4	0.5 - 10	18.5	0.6	140, 141, 140, 142	327, 330, 340, 345	-	-	3.25, 2.35, 1.25, 0.95	yes	ice lids, gradually increased thickness
7	salt	fast	1.9	Na2SO4	0.5 - 10	19.2	0.6	142, 142, 143, 147	298, 385, 380, 345	-	-	4.25, 1.45, 2.15, 2.55	yes	mirabilite precipitation in d
8	salt	fast	0.7	Na2SO4	0.5 - 10	18.35	0.4	140, 141, 144, 150	325, 326, 395, 420	-	-	3.37, 1.55, 1.05, 7.15	yes	mirabilite precipitation in d
9	salt	fast	1.7	Na2SO4	0.5 - 10	18.05	0.3	140, 140, 141, 144	310, 337, 338, 340	-	-	3.55, 1.45, 3.45, 4.35	yes	mirabilite precipitation in d
10	all	fast	0.6	all	10	18.65	1	138, 145, 140, 136	347, 849, 426, 240	26.1, 18.1, 20.9, 20.4	3.7, 1.8, 2.6, 3.7	0.65, -6.55, 5.55, 4.65	yes	c,d frozen whole volume
11	all	fast	1.7	all	0.5	18.95	0.4	142, 143, 143, 144	333, 351, 347, 318	21.4, 21, 21, 19	3.7, 3.7, 3.9, 4.1	3.95, 2.95, 3.25, 3.85	yes	similar times, similar lid thickness
12	salt	fast	1.7	CaSO4	0.5 - 10	19.65	0.2	146, 147, 147, 146	318, 337, 353, 350	-	-	4.05, 3.55, 2.35, 5.35	yes	increased thickness for d
13	salt	fast	0.7	CaSO4	0.5 - 10	19.05	0.7	141, 142, 143, 143	325, 335, 337, 363	-	-	2.95, 2.25, 2.15, 3.95	yes	similar freezing time and lid thickness
14	all	fast	0.5	all	10	18.75	0.2	141, 146, 143, 138	316, 709, 462, 310	27.5, 17.7, 22.6, 19.8	5.1, 1, 2, 4.5	1.45, -6.65, 7.25, 5.05	yes	c,d frozen whole volume
15	all	fast	0.5	all	10	18.35	0.4	145, 151, 146, 144	393, 721, 481, 386	24.8, 17, 18.7, 18.7	3, 1.3, 2.6, 3.2	-0.15, -5.55, 0.75, 4.85	yes	c,d frozen whole volume
16	salt	fast	0.7	CaSO4	0.5 - 10	18.65	0.2	142, 142, 142, 144	395, 330, 350, 397	-	-	3.15, 1.75, 1.65, 3.85	yes	similar lid thickness
17	salt	fast	0.6	CaSO4	0.5 - 10	18.75	0.3	144, 144, 144, 145	335, 323, 318, 393	-	-	2.75, 2.95, 2.45, 3.25	no	freezing does not occur gradually
18	all	fast	0.8	all	0.5	17.95	0.3	145, 147, 147, 146	313, 312, 311, 323	21.2, 20.1, 23, 23.5	4.3, 4.3, 4.3, 4	2.05, 2.15, 1.75, 1.95	yes	similar freezing time and lid thickness
19	all	fast	0.5	all	0.5	18.75	0.6	148, 149, 149, 148	305, 308, 293, 296	19.1, 18.7, 18.6, 19.1	4.2, 4.2, 4.5, 4.3	2.45, 2.35, 3.15, 3.15	yes	similar boiling and freezing times, thickness
20	all	slow	0.5	all	10	19.15	0.3	1765, 1771, 1770, 1763	2471, 3653, 2476, 2354	18.4, 18, 18.1, 18.7	3.7, 1.2, 3.9, 4.6	0.95, -7.15, 5.15, 5.35	no	strongly different boiling and freezing times
21	D.I. water	fast	1.1	-	-	17.45	0.15	140, 141, 140, 140	309, 310, 308, 312	17, 16.6, 17, 17	3.9, 4, 4, 3.9	3.05, 2.85, 2.85, 3.25	yes	reference experiment, similar trends of a-d
22	D.I. water	slow	1.1	-	-	15.85	0.2	1355, 1357, 1351, 1352	1638, 1639, 1632, 1624	13.7, 13.6, 14, 14	3.1, 3.1, 3.2, 3.6	2.75, 2.85, 2.95, 1.65	no	reference experiment, similar trends of a-d
23	D.I. water	fast	1.5	-	-	16.05	0.3	141, 139, 142, 142	305, 303, 306, 304	16.3, 17.1, 16, 16	4.1, 4.2, 4, 4.1	2.85, 2.15, 2.15, 2.65	yes	reference experiment, similar trends of a-d
24	D.I. water	fast	1.2	-	-	10.85, 16.95, 34.85	-	169, 145, 99	334, 310, 268	12.6, 17.9, 60.5	2.6, 3.7, 4.9	2.35, 2.95, 5.25	yes	tested various T of water
25	D.I. water	slow	0.9	-	-	2.85, 17.35, 27.25	-	1440, 1292, 1098	1636, 1615, 1572	6.7, 16.3, 37.4	2.5, 3, 4.3	1.95, 3.25, 5.15	no	tested various T of water
26	all	slow	2.3	all	0.5	18.15	0.4	1863, 1852, 1859, 1849	2292, 2297, 2301, 2256	16.5, 17.5, 16.8, 17.7	3.3, 3.7, 3.4, 3.9	2.45, 3.05, 1.95, 2.95	no	similar trends, lid thickness
27	all	slow	1.7	all	0.5	17.95	0.7	1386, 1366, 1387, 1364	1725, 1722, 1710, 1715	16, 12.4, 16, 17.4	3.5, 2.7, 3.2, 2.7	2.25, 2.35, 2.65, 2.55	no	similar trends, lid thickness
28	all	slow	0.7	all	0.5	17.85	1	1578, 1563, 1559, 1556	1807, 1832, 1818, 1804	16.1, 16.9, 17.2, 17.4	3.7, 3.6, 3.8, 3.8	1.85, 2.45, 1.65, 3.45	no	similar trends, lid thickness
29	all	slow	0.8	all	10	19.15	0.4	1491, 1515, 1500, 1495	1751, 2255, 1802, 1730	18.2, 16.4, 17.5, 17.9	3.4, 1, 3.5, 3.8	1.55, -13.35, 1.75, 4.85	yes	strongly different boiling and freezing times
30	all	slow	0.5	all	10	18.65	0.4	1374, 1386, 1378, 1368	1686, 1976, 1659, 1590	17.5, 15.9, 16.9, 18.4	3.7, 1.1, 3.7, 3.8	-0.05, -6.45, 3.25, 2.75	no	strongly different trends and precipitations
31	mixture	fast	1.1	MgSO4 + Na2SO4/NaCl	2.5:2.5/ 5:5/ 2.5:7.5/2.5:2.5	18.15	0.3	137, 139, 139, 141	430, 478, 537, 477	19.5, 17.5, 17.5, 16.8	3.4, 3.2, 3, 3.2	1.35, -0.55, -2.05, -	no	various freezing and thickness
* two major sets of experiments: 1) salt with 4 different w/w concentrations (0.5%, 2.5%, 5% and 10%); 2) Four tested salts (MgSO4, NaCl, Na2SO4, CaSO4) with the same concentrtion
** Maximum difference between the initial temperatures
*** Approximate time when solution starts to boiling after (captured times of initial rapid T drop in solutions) ; indexes a-d in the brackets represent type of the salt (MgSO4, NaCl, Na2SO4, CaSO4) or current conentrations (0.5 %, 2.5 %, 5 %, 10 %)
**** Approximate time when solution starts to freeze (form an ice lid)
*5 For selected and deeply analyzed experiments; Pressure value corresponds to position in the middle of the chamber (secondary P logger counts value +1.5 mbar)
*6 Temperature at the final moment before pressurization
*7 D.I. water reference experiment used the same cylinders in the same positions; a-d are denoted samples from left to right )same order as for salts)
