# Supplementary material for: How salts affect mud mobility at low pressures: implications for Mars and other extraterrestrial bodies
Source: Research Square preprint supplement (doi:10.21203/rs.3.rs-4795332/v1), 2024-09-18
Supplement: Supplementary file 2 [file 98b79c050799821c8c176e3e.docx]

**Table XX.** Results of thermodynamic simulations of freezing of salt solutions. In all cases, only a single secondary salt phase was predicted to form during freezing. Temperatures are reported to the nearest 0.1 °C. Eutectic temperatures correspond to salt formation temperatures for all solutions with the exception of CaSO4 solutions, wherein gypsum was supersaturated at room temperature. In this latter case, the eutectic temperature corresponds to the ice formation temperature.

|  |  |  |  |  |  |  |  |
| --- | --- | --- | --- | --- | --- | --- | --- |
|  | **Initial salt** | **Concentration, wt%** | **Ice formation temp., °C** | **Secondary salt phasea** | **Salt formation temp., °C** | **Eutectic temp., °C** |  |
|  | NaCl | 0.5 | -0.4 | Hydrohalite | -21.2 | -21.2 |  |
|  |  | 10 | -6.0 | Hydrohalite | -21.2 | -21.2 |  |
|  | MgSO4 | 0.5 | -0.2 | Meridianiite | -3.8 | -3.8 |  |
|  |  | 10 | -1.7 | Meridianiite | -3.8 | -3.8 |  |
|  | Na2SO4 | 0.5 | -0.2 | Mirabilite | -1.2 | -1.2 |  |
|  |  | 10 | -1.2 | Mirabilite | -1.2 | -1.2 |  |
|  | CaSO4 | 0.5 | -0.1 | Gypsum | 20.0 | -0.1 |  |
|  |  | 10 | -0.1 | Gypsum | 20.0 | -0.1 |  |
|  |  |  |  |  |  |  |  |

aHydrohalite: NaCl·2H2O; Meridianiite: MgSO4·11H2O; Mirabilite: Na2SO4·10H2O; Gypsum: CaSO4·2H2O
