# Supplementary material for: How salts affect mud mobility at low pressures: implications for Mars and other extraterrestrial bodies
Source: Research Square preprint supplement (doi:10.21203/rs.3.rs-4795332/v1), 2024-09-18
Supplement: Supplementary file 3 [file a3ec55db2f436aab2f70d66f.xlsx]

## Sheet: Flow_experiments
Flow
Exp #	Pressure range	Salt *	Concentration	Mud temperature	Surface Temperature	Release time	Included in	Cooling exp.	Flow type
	[mbar]		[% w/w] **	[°C] ***	[°C]	[s] ****	main analysis	counterpart *5	stream/length/surface/speed
7	4.5 (6.0) - 5.9 (7.4)	MgSO4	10	18.85/-1.15	-23	56	yes	yes	narrow/long/ropy/slow
8	4.6 (6.1) - 5.7 (7.2)	MgSO4	0.5	18.90/-0.15	-26	40	yes	yes	multiple/short/lobes/very slow
9	4.7 (6.2) - 5.6 (7.1)	MgSO4	0.5	19.85/-0.16	-17	41	yes	yes	multiple/short/lobes/very slow
10	4.5 (6.0) - 5.8 (7.3)	NaCl	10	18.80/0.85	-25	37	yes	yes	wide/average/flat/medium
11	4.8 (6.3) - 5.9 (7.4)	MgSO4	10	17.80/-0.10	-23	47	yes	yes	narrow/long/ropy/slow
12	4.6 (6.1) - 5.8 (7.4)	MgSO4	10	19.80/-1.15	-22	37	yes	yes	narrow/average/ropy/slow
13	4.3 (5.8) - 5.7 (7.1)	NaCl	10	18.85/-1.17	-27	40	yes	yes	very wide/short/flat/very slow
14	4.6 (6.1) - 5.8 (7.4)	NaCl	0.5	19.90/-0.10	-29	27	yes	yes	wide/very short/lobe/very slow
15	4.6 (6.1) - 5.8 (7.4)	NaCl	10	20.65/2.65	-16	44	yes	yes	circular/short/flat/very slow
16	4.5 (6.0) - 5.8 (7.3)	NaCl	0.5	20.60/-1.15	-23	36	yes	yes	multiple/short/lobes/slow
17	4.5 (6.0) - 5.8 (7.3)	MgSO4	0.5	20.75/0.05	-23	41	yes	yes	multiple/short/lobes/slow
18	4.6 (6.1) - 5.8 (7.4)	NaCl	0.5	19.85/-0.15	-12	40	yes	yes	narrow/average/lobes/slow
19	4.3 (5.8) - 5.7 (7.1)	MgSO4	15	19.90/-1.05	-23	35	yes	no	short/wide/flat/very slow
20	4.7 (6.2) - 5.8 (7.3)	NaCl	5	19.80/-1.20	-22	42	yes	yes	long/wide/flat/fast
21	4.6 (6.1) - 5.8 (7.4)	Na2SO4	0.5	19.85/0.85	-18	20	yes	yes	circular/very short/lobe/very slow
22	4.5 (6.0) - 5.8 (7.3)	MgSO4	15	19.85/-1.10	-26	34	yes	no	wide/average/flat/slow
23	4.6 (6.1) - 5.8 (7.4)	Na2SO4	0.5	19.80/1.80	-19	25	yes	yes	multiple/very short/lobes/very slow
24	4.5 (6.0) - 5.8 (7.3)	NaCl	5	19.90/1.85	-20	39	yes	yes	wide/average/flat/medium
25	4.6 (6.1) - 5.8 (7.3)	Na2SO4	10	19.90/3.80	-21	35	yes	yes	wide/average/flat/medium
26	4.5 (6.0) - 5.9 (7.4)	Na2SO4	10	18.90/3.90	-23	28	yes	yes	wide/short/flat/medium
27	4.5 (6.0) - 5.8 (7.3)	NaCl	5	19.85/-1.35	-31	37	yes	yes	wide/avarage/flat/medium
28	4.5 (6.0) - 5.8 (7.3)	Na2SO4	5	20.55/-1.15	-19	30	yes	yes	circular/short/flat/very slow
29	4.5 (6.0) - 5.8 (7.3)	Na2SO4	15	20.85/1.90	-23	28	yes	no	wide/short/flat/slow
30	4.6 (6.1) - 5.8 (7.3)	CaSO4	5	20.75/0.60	-26	25	yes	yes	multiple/very short/lobes/very slow
31	4.6 (6.1) - 5.8 (7.3)	NaCl	2.5	20.50/-2.15	-24	37	yes	yes	narrow/long/ropy/medium
32	4.5 (6.0) - 5.9 (7.4)	Na2SO4	5	20.90/1.75	-22	30	yes	yes	wide/average/ropy/medium
33	4.5 (6.0) - 5.8 (7.3)	Na2SO4	5	20.85/-0.20	-24	38	yes	yes	circular/short/ropy/slow
34	4.4 (5.9) - 5.0 (6.5)	CaSO4	10	20.85/1.05	-23	failed exp.	no	yes	N/A
35	4.5 (6.0) - 5.8 (7.3)	NaCl	2.5	20.65/1.00	-19	55	yes	yes	average/very long/ropy/fast
36	4.4 (5.9) - 5.8 (7.3)	CaSO4	0.5	19.90/0.95	-25	20	yes	yes	multiple/very short/lobes/very slow
37	4.5 (6.0) - 5.8 (7.3)	Na2SO4	0.5	19.90/-0.20	-22	26	yes	yes	circular/very short/lobe/very slow
38	4.5 (6.0) - 5.8 (7.3)	Na2SO4	10	20.50/-1.30	-19	40	yes	yes	average/long/flat/medium
39	4.4 (5.9) - 5.9 (7.4)	CaSO4	0.5	20.50/-0.15	-33	25	yes	yes	multiple/short/lobes/slow
40	4.5 (6.0) - 5.8 (7.3)	NaCl	2.5	20.50/0.95	-28	40	yes	yes	wide/average/flat/medium
41	4.6 (6.1) - 5.8 (7.3)	CaSO4	5	20.85/0.80	-21	25	yes	yes	multpile/short/lobes/slow
42	4.5 (6.0) - 5.8 (7.3)	CaSO4	5	20.75/0.80	-22	26	yes	yes	multiple/very short/lobes/very slow
43	4.5 (6.0) - 5.8 (7.3)	CaSO4	0.5	19.80/-0.15	-22	30	yes	yes	multiple/very short/lobes/very slow
44	4.6 (6.1) - 5.8 (7.3)	CaSO4	10	19.85/0.75	-26	25	yes	yes	multiple/short/lobes/very slow
45	4.6 (6.1) - 5.8 (7.3)	CaSO4	10	19.85/0.80	-27	24	yes	yes	multiple/short/lobes/very slow
46	4.4 (5.9) - 5.8 (7.3)	Na2SO4	15	20.80/-0.20	-26	23	no	no	wide/short/flat/slow
47	4.5 (6.0) - 5.8 (7.3)	MgSO4	15	19.95/0.85	-24	43	no	no	narrow/long/ropy/medium
48	4.5 (6.0) - 5.8 (7.3)	CaSO4	10	20.45/0.80	-16	30	no	yes	multiple/short/lobes/slow
49	4.4 (5.9) - 5.9 (7.4)	MgSO4 + Na2SO4	5	19.50/-0.35	-29	27	no	yes	average/average/ropy/medium
50	4.5 (6.0) - 5.8 (7.3)	CaSO4	10	19.65/0.65	-30	18	yes	yes	multiple/short/lobes/slow
51	4.5 (6.0) - 5.8 (7.3)	MgSO4 + Na2SO4	10	19.60/-0.20	-27	30	no	yes	wide/long/flat/fast
52	4.4 (5.9) - 5.8 (7.3)	NaCl + Na2SO4	5	18.75/-0.15	-25	42	no	yes	narrow/very long/ropy/fast
53	4.5 (6.0) - 5.8 (7.3)	MgSO4	5	20.25/-1.20	-25	40	yes	yes	narrow/very long/lobes/fast
54	4.5 (6.0) - 5.8 (7.3)	MgSO4	5	20.35/0.95	-23	35	yes	yes	multpile/very long/lobes/fast
55	4.3 (5.8) - 5.8 (7.3)	MgSO4	5	19.70/1.00	-21	32	yes	yes	narrow/long/lobes/fast
* Salt combinations werere prepared in the ratio 1:1 (w/w)
** Exp #46-#48 were prepared with using of a same volume of the pre-prepared salt binars instead of weight fraction (to test the effect of a different water content)
*** Approximate temperature within the container before/after the pressure drop (at a moment of release)
**** Time period of the mud release from the container
*5 Existence of the cooling experiment with the same salt-water concentration
*6 Exps. marked by italic have stored movies in the supplemenetary materials (corresponding to images on Figure 2 and 3)
